# Supplementary material for: Partitioning the Genomic Components of Behavioral Disinhibition and Substance Use (Disorder) Using Genomic Structural Equation Modeling
Source: PubMed Central journal article supplement — medRxiv. 2024 Feb 27:2024.02.20.24303036. Preprint. [Version 1] doi: 10.1101/2024.02.20.24303036 (PMC10925358; doi:10.1101/2024.02.20.24303036), 2024-02-27

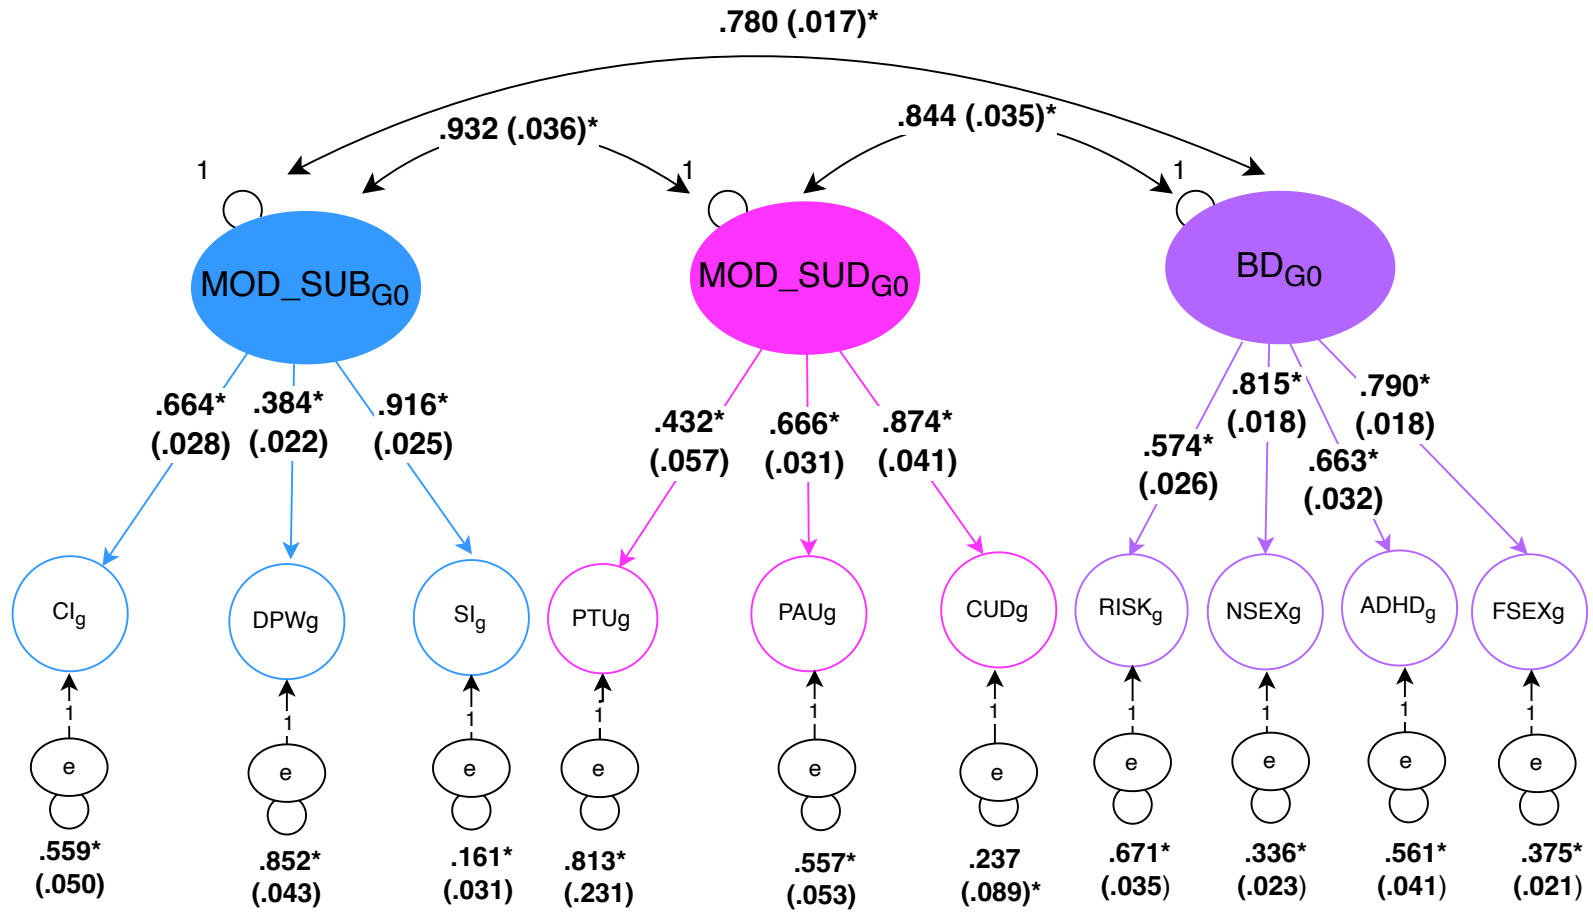

Supplement: media-13.pdf [file media-13.pdf]
